# Supplementary material
Source: PubMed Central journal article supplement (PMC3387331)
Supplement: NIHMS374755-supplement.pdf [file NIHMS374755-supplement.pdf]

# 1 **Genomewide association study of the age of onset of childhood asthma**

## 2 **Online Supplement**

3

4 Erick Forno, MD MPH<sup>1,3,4,\*</sup>, Jessica Lasky-Su, ScD<sup>1,4</sup>, Blanca Himes, PhD<sup>1,4</sup>, Judie Howrylak,  
5 MD<sup>1</sup>, Clare Ramsey, MD MPH<sup>5</sup>, John Brehm, MD MPH<sup>1,2,4</sup>, Barbara Klanderma, PhD<sup>1</sup>, John  
6 Ziniti, BA<sup>1</sup>, Erik Melén, MD PhD<sup>1,6,7</sup>, Goran Pershagen, MD PhD<sup>6</sup>, Magnus Wickman, MD  
7 PhD<sup>6,8</sup>, Fernando Martinez, MD<sup>9</sup>, Dave Mauger, PhD<sup>10</sup>, Christine Sorkness, PharmD<sup>11</sup>, Kelan  
8 Tantisira, MD<sup>1,2,4</sup>, Benjamin A. Raby, MD MPH<sup>1,2,4</sup>, Scott T. Weiss, MD MS<sup>1,4</sup>, Juan C.  
9 Celedón, MD DrPH<sup>12</sup>

10

11 <sup>1</sup>Channing Laboratory and <sup>2</sup>Division of Pulmonary/Critical Care Medicine, Dept. of Medicine, Brigham and  
12 Women's Hospital, Boston, MA; <sup>3</sup>Division of Pediatric Pulmonology, Dept. of Pediatrics, University of  
13 Miami, Miami, FL; <sup>4</sup>Harvard Medical School, Boston, MA; and <sup>5</sup>Dept. of Medicine, University of Manitoba,  
14 Winnipeg, Canada; <sup>6</sup>Institute of Environmental Medicine, Karolinska Institutet, Stockholm, Sweden; <sup>7</sup>Astrid  
15 Lindgren Children's Hospital, Karolinska University Hospital, Stockholm, Sweden; <sup>8</sup>Sachs Children's  
16 Hospital, Stockholm, Sweden; <sup>9</sup>Department of Pediatrics, University of Arizona, Tucson, AZ; <sup>10</sup>Penn State  
17 Hershey College of Medicine, Hershey, PA; <sup>11</sup>University of Wisconsin, Madison, WI; <sup>12</sup>Division of Pediatric  
18 Pulmonary Medicine, Allergy and Immunology, Dept. of Pediatrics, Children's Hospital of Pittsburgh of  
19 UPMC, University of Pittsburgh School of Medicine, Pittsburgh, PA.

20

21 \*Corresponding author: Erick Forno, M.D., M.P.H.  
22 Department of Pediatrics, University of Miami  
23 1580 NW 10<sup>th</sup> Ave #125, Miami, FL 33136  
24 Phone: 305.243.1420; Fax: 305.243.1262  
25 Email: [eforno@med.miami.edu](mailto:eforno@med.miami.edu)

26 **METHODS**

27 ***Population for the GWAS (CAMP)***

28 For the CAMP trial, asthma was defined by symptoms greater than 2 times per week, the use of  
29 an inhaled bronchodilator at least twice weekly or the use of daily medication for asthma, and  
30 airway responsiveness to  $\leq 12.5$  mg/ml of methacholine. Children with severe asthma or other  
31 clinically significant conditions were excluded. In CAMP, 1,041 asthmatic children were  
32 followed up for 4-6 years. Of these, 968 children and 1,518 of their parents contributed DNA  
33 samples. For this study, we restricted our analysis to 573 non-Hispanic white children (413 index  
34 children in nuclear families and 160 singletons).

35

36 ***Phenotypic assessment***

37 Spirometry was conducted at baseline in CAMP, GACRS and PACT following American  
38 Thoracic Society recommendations (1). In CAMP, subsequent measurements were obtained at  
39 4-month intervals throughout the 48 months of the study; completion rate was ~94%. Albuterol  
40 use was assessed at the same intervals in CAMP via parental report (range of the score was 0-4,  
41 where 0=none, 1=less than once a week, 2=at least once a week, 3=at least twice a week,  
42 4=daily). Total serum IgE and peripheral eosinophil counts were assessed at the beginning of  
43 each study, and were  $\log_{10}$ -transformed for analysis.

44

45 ***Genotyping and QC in CAMP***

46 Stringent quality-control was conducted for the genome-wide genotypic data (see **Table S1**):  
47 6,257 markers were removed due to low clustering scores, and 1,329 markers were removed  
48 because their flanking sequences did not map to a unique position on the hg17 reference genome  
49 sequence. Further quality control was performed with PLINK v1.03 (2). The average completion  
50 rate for each marker was >99%. Monomorphic markers (n=3,790) and those with  $\geq 5$  Mendelian  
51 errors (n=2,445) were removed. We assessed genotype reproducibility by plating 4 subjects once  
52 on each of 14 plates. All of these replicates had >99.8% concordance. The average genotyping  
53 completion rate for each subject was 99.75%. No filtering was done based on Hardy-Weinberg  
54 equilibrium due to ascertainment of the cohort through affected probands. Thus, 547,645  
55 (97.5%) of the 561,466 SNPs in the BeadChip passed quality control. Further, SNPs with low

56 minor allele frequencies (MAF) <1% and SNPs located in sex chromosomes were excluded,  
57 leaving 512,296 SNPs for analysis.

58

### 59 ***Genotyping in replication cohorts***

60 SNPs selected for replication were subsequently genotyped in GACRS using Sequenom  
61 MassArray genotyping with iPlex chemistry (12 SNPs) and Taqman (Applied Biosystems)  
62 assays (2 SNPs). Completion rate was 96% and concordance was 99.9%. In BAMSE, genotyping  
63 was performed using the Illumina Human610 quad array. All samples had genotyping success  
64 rate >95%. Genotyping in PACT was performed using the Affymetrix Genome-Wide Human  
65 SNP Array 6.0 (Affymetrix, Santa Clara, CA). Completion rate was >96.5% for all included  
66 subjects, with the average completion rate >99%. When markers from Illumina were not  
67 available in Affymetrix, we used imputed data (see below) and also performed an exploratory  
68 analysis using selected available SNPs with the highest LD possible (highest  $r^2$  for CEU trios  
69 from the HapMap).

70

### 71 ***Genotypic data imputation in PACT***

72 Two of the selected SNPs were not genotyped in PACT (rs4658627 and rs7927044). For  
73 rs4658726, imputation was performed on the June 2010 release of the 1000 Genome Project  
74 (1KGP) data was performed using the Markov Chain Haplotyping software (MaCH)(3). For  
75 rs7927044, imputation was performed on data from the HapMap project (Phase 2 Release 22)  
76 using the same software. The ratio of the empirically observed dosage variance to the expected  
77 (binomial) dosage variance for imputed SNPs utilized was >0.5 for both imputed SNPs,  
78 indicating good quality of imputation. For imputed SNPs, dosage data was used to compute  
79 association statistics.

80

### 81 ***Genotypic data imputation in CAMP***

82 Imputation of all SNPs available in the June 2010 release of the 1KGP data that were not  
83 genotyped or failed QC was performed with the Markov Chain Haplotyping software  
84 (MaCH)(3). The ratio of the empirically observed dosage variance to the expected (binomial)  
85 dosage variance for imputed SNPs utilized was greater than 0.5, indicating good quality of  
86 imputation.

87

88 ***Gene expression profiling***

89 CD4+ lymphocytes were isolated from peripheral blood samples collected from 299 subjects  
90 from four clinical centers (Baltimore, Boston, Denver, St. Louis) participating in the Childhood  
91 Asthma Management Program (CAMP) Continuation Study, part 2 (CAMPCS/2); CAMPCS/2  
92 was the second of two 4-years observational follow-up studies of CAMP participants carried out  
93 upon completion of the original CAMP study. Blood samples for this analysis were obtained  
94 during a routine CAMPCS/2 clinical visit between May 2004 and July 2007. CD4+ T cells were  
95 isolated from the collected mononuclear cell layer using anti-CD4+ microbeads by column  
96 separation (Miltenyi Biotec, Auburn, CA) (4). Total RNA was extracted using the RNeasy Mini  
97 Protocol (QIAGEN, Valencia, CA) (5). Expression profiles were generated with the Illumina  
98 HumanRef8 v2 BeadChip arrays (Illumina, San Diego, CA) and arrays were read using the  
99 Illumina BeadArray scanner and analyzed using BeadStudio (version 3.1.7) without background  
100 correction. Raw expression intensities were processed using the lumi package (6) of  
101 Bioconductor with background adjustment with RMA convolution (7) and  $\log_2$  transformation of  
102 each array. The combined samples were quantile normalized. The normalized microarray data  
103 are available through the GeneExpression Omnibus of the National Center for Biotechnology  
104 Information (<http://www.ncbi.nlm.nih.gov/geo/>, accession number GSE22324). The expression  
105 data for C1orf100 (assayed on the HumanRef8 v2 array by probe ID ILMN\_8320, with sequence  
106 TAGCCACAGTTTCGCTGAATCCTCGACCGCTTAATTCAGTCCAGAGCTC) was  
107 assessed for association with FEV<sub>1</sub> (percent predicted), FEV<sub>1</sub>/FVC, and albuterol use by repeated  
108 measures analysis in SAS v9.2, using the MIXED procedure assuming a fixed-effects covariance  
109 structure, and adjusted for all covariates in the main analyses.

110

111 ***Statistical methods for phenotypic variables***

112 To assess whether SNPs associated with asthma onset were also associated with indicators of  
113 asthma severity, we conducted longitudinal analyses of FEV<sub>1</sub> and albuterol use score in CAMP  
114 adjusted for age and height at randomization, gender, race, ETS, study center, total IgE, and  
115 peripheral eosinophil count. Analyses were done by mixed-effects regression models. Children  
116 in the budesonide arm were excluded to avoid confounding by treatment with inhaled  
117 corticosteroids, which had an effect on lung function in CAMP. Residual maximum likelihood

118 estimation with spatial-exponential covariance structure was used. Fixed-effects test statistics  
119 were adjusted using the “sandwich” error estimator. Longitudinal P-values reported are from  $\chi^2$   
120 tests with  $n-1$  degrees of freedom, where  $n$  is the number of measurements for each outcome.  
121 Analysis was done using SAS v9.2 (SAS Institute, Cary, NC).  
122

123 **Table E1. Summary of the QC and cleaning procedures in the CAMP GWAS**

| <i>Attribute</i>                             | <i>Count (% of 561,466 markers on array)</i> |
|----------------------------------------------|----------------------------------------------|
| Low Illumina QC score                        | 6,257 (1.1%)                                 |
| Flank sequences do not map to hg17           | 1,329 (0.2%)                                 |
| Monomorphic                                  | 3,790 (0.7%)                                 |
| Parent-offspring inconsistencies >4          | 2,445 (0.4%)                                 |
| Total number of failed markers               | 13,821 (2.5%)                                |
| <hr/>                                        |                                              |
| Total number of passed markers               | 547,645 (97.5%)                              |
| Autosomes                                    | 534,290 (95.2%)                              |
| Sex-linked                                   | 13,229 (2.4%)                                |
| Mitochondrial genome                         | 126 (0.02%)                                  |
| Autosomal markers with MAF < 1%              | 21,994 (3.9%)                                |
| <hr/>                                        |                                              |
| Total autosomal markers used in the analysis | <b>512,296 (91.2%)</b>                       |

125 **Figure E1.** QQ plot for CAMP GWAS

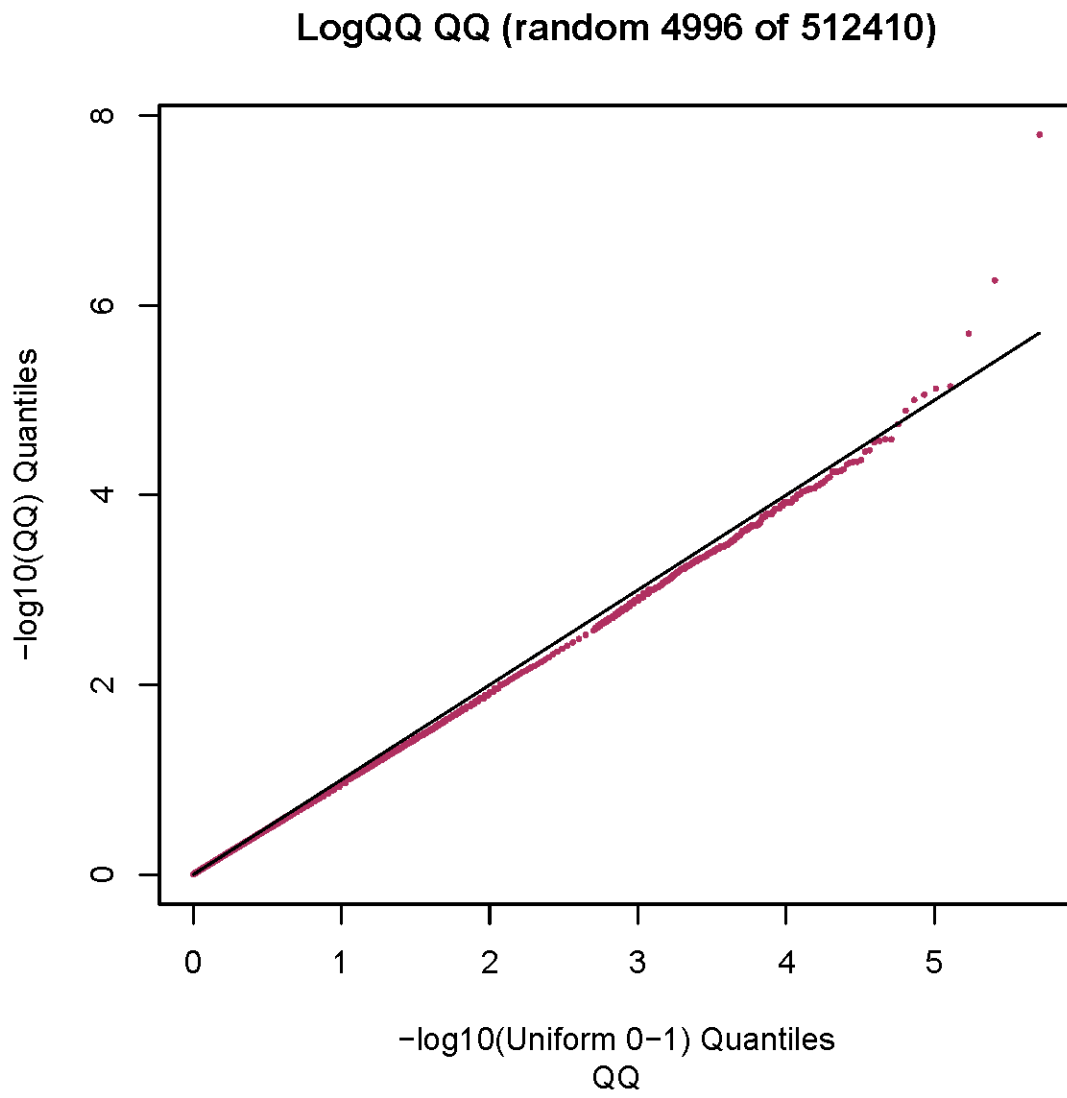

126

127 **Legend:** Probability quantile-quantile plot for the CAMP GWAS

**Figure E2. LD plots for SNPs rs9815663 (top), rs7927044 (middle), and rs4658627 (bottom)**

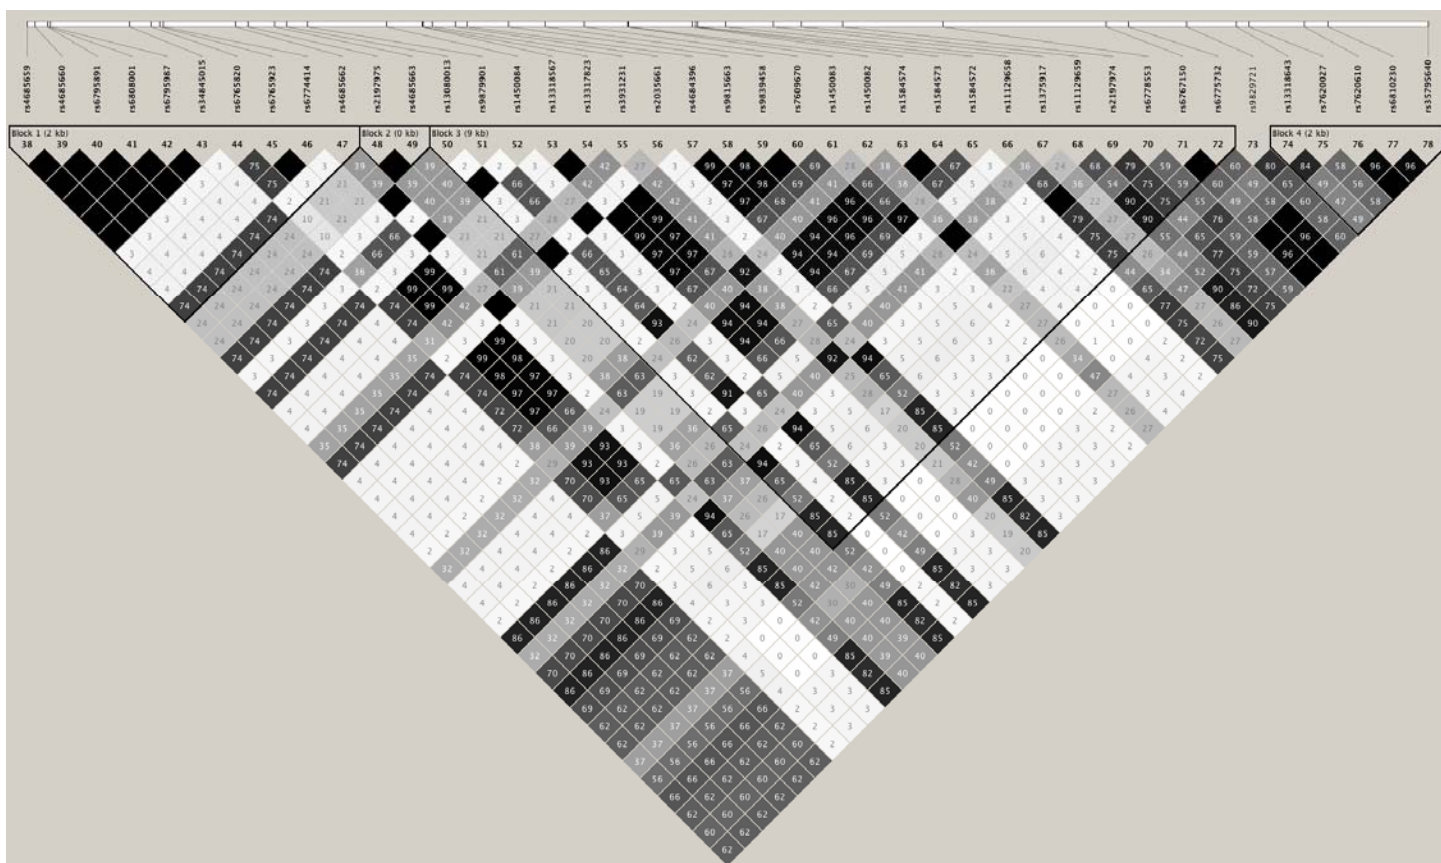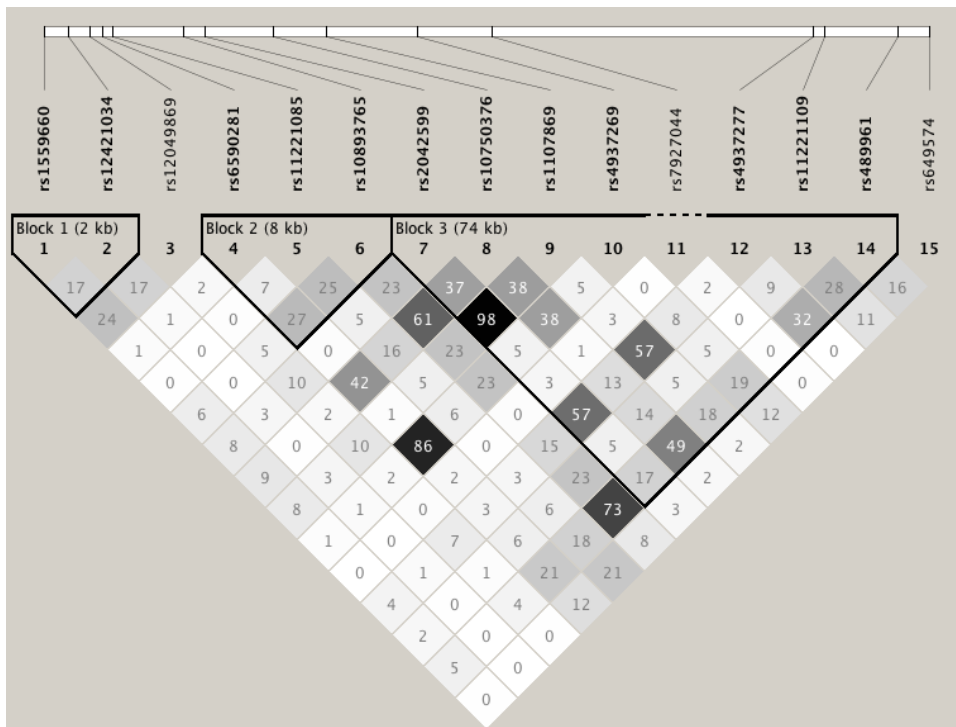



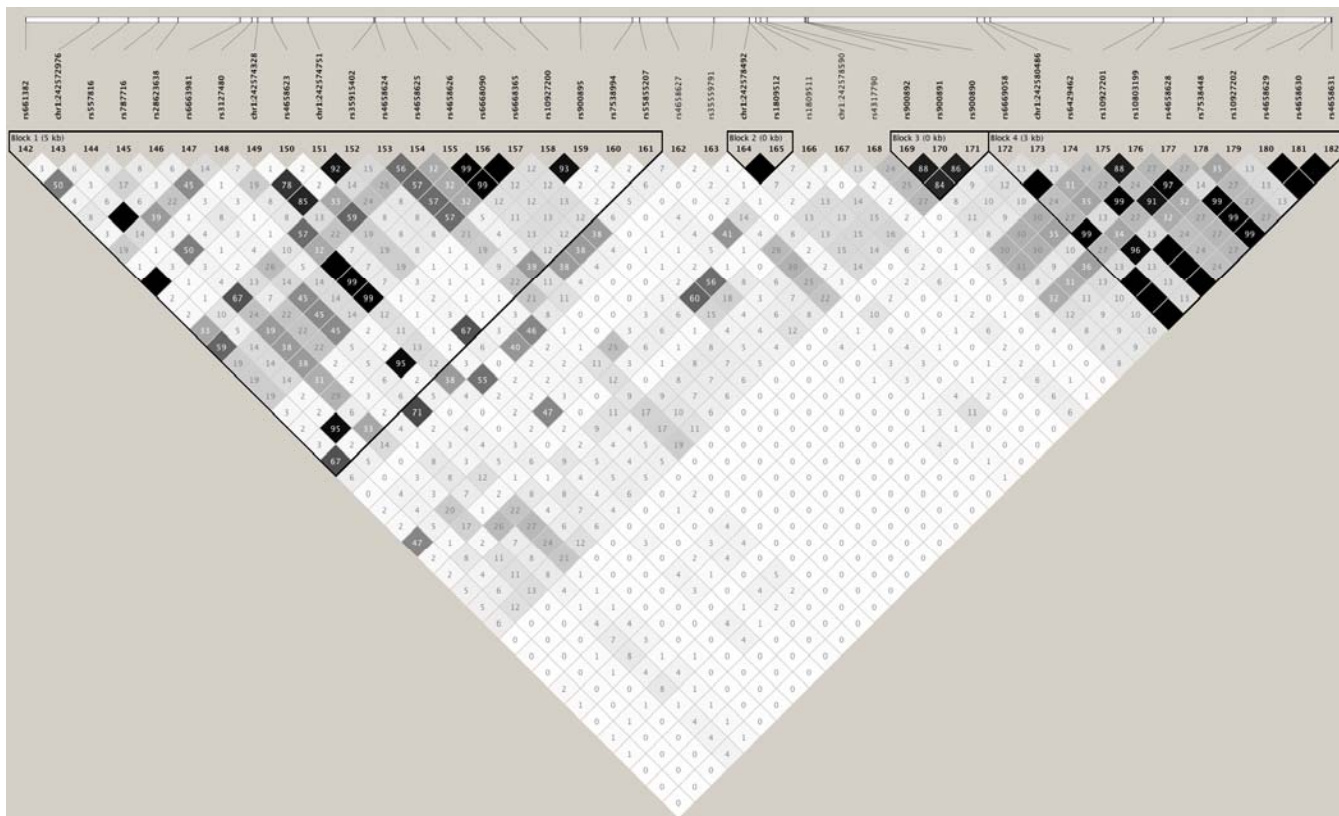

131

132

133

134

**Legend:** Figures show the LD plots for the three top SNPs from the CAMP GWAS. Plots were obtained using imputed genotypic data in CAMP generated from the 1000 Genomes Project.

135 **REFERENCES**

136 (1) American Thoracic Society. Standardization of Spirometry, 1994 Update. Am J Respir Crit  
137 Care Med 1995 Sep;152(3):1107-36.

138 (2) Purcell S, Neale B, Todd-Brown K, Thomas L, Ferreira MA, Bender D, et al. PLINK: a tool  
139 set for whole-genome association and population-based linkage analyses Am J Hum Genet 2007  
140 Sep;81(3):559-575.

141 (3) Willer CJ, Sanna S, Jackson AU, Scuteri A, Bonnycastle LL, Clarke R, et al. Newly  
142 identified loci that influence lipid concentrations and risk of coronary artery disease Nat Genet  
143 2008 Feb;40(2):161-169.

144 (4) Jonuleit H, Schmitt E, Schuler G, Knop J, Enk AH. Induction of interleukin 10-producing,  
145 nonproliferating CD4(+) T cells with regulatory properties by repetitive stimulation with  
146 allogeneic immature human dendritic cells J Exp Med 2000 Nov 6;192(9):1213-1222.

147 (5) Gonzalez P, Zigler JS,Jr, Epstein DL, Borrás T. Identification and isolation of differentially  
148 expressed genes from very small tissue samples BioTechniques 1999 May;26(5):884-6, 888-92.

149 (6) Du P, Kibbe WA, Lin SM. lumi: a pipeline for processing Illumina microarray  
150 Bioinformatics 2008 Jul 1;24(13):1547-1548.

151 (7) Irizarry RA, Hobbs B, Collin F, Beazer-Barclay YD, Antonellis KJ, Scherf U, et al.  
152 Exploration, normalization, and summaries of high density oligonucleotide array probe level data  
153 Biostatistics 2003 Apr;4(2):249-264.

154
